# Supplementary material
Source: HighWire-hosted journal article supplement (https://thorax.bmj.com/content/76/1/64)

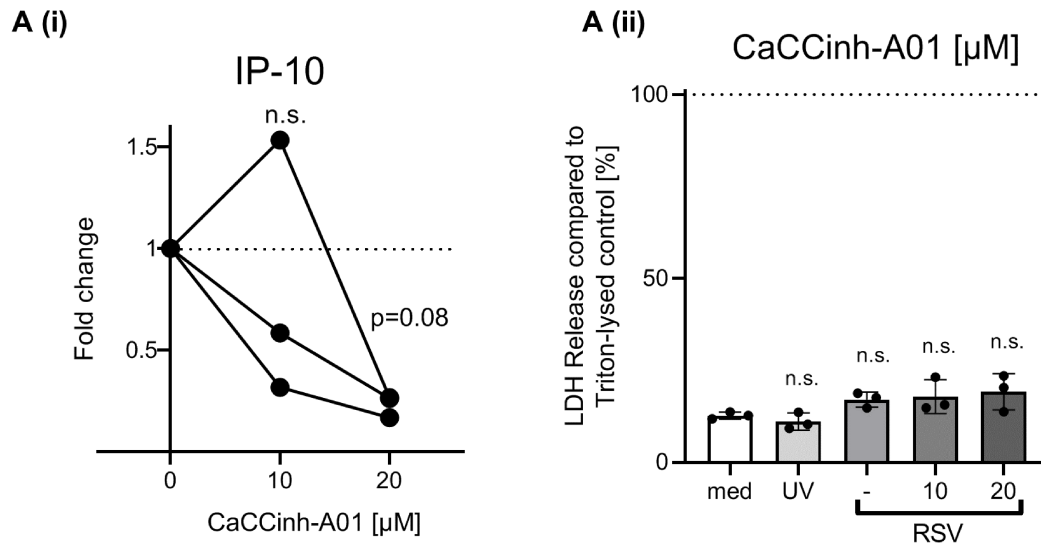**Figure S1**

Supplement: inline-supplementary-material-2 [file inline-supplementary-material-2.pdf]
